# Supplementary material for: Characterization of an Electronic Nicotine Delivery System (ENDS) Aerosol Generation Platform to Determine Exposure Risks
Source: MDPI journal article supplement (doi:10.3390/toxics11020099), 2023-01-21
Supplement: s1 [file s1]

## Supplemental Materials

Table S1. Puff conditions for pod-type devices under dynamic chamber setup.

| # | # of pod | e-liquid       | dilution factor | puff number for each pod | puff rate (#/min) |
|---|----------|----------------|-----------------|--------------------------|-------------------|
| 1 | 2        | Tobacco 1 (5%) | 1.11            | 1-50                     | 2                 |
|   | 2        | Tobacco 1 (5%) | 1.11            | 51-100                   | 2                 |
|   | 2        | Tobacco 1 (5%) | 1.11            | 101-150                  | 2                 |
|   | 2        | Tobacco 1 (5%) | 1.11            | 151-200                  | 2                 |
| 2 | 3        | Tobacco 2 (5%) | 2.94            | 1-24                     | 2                 |
|   | 3        | Tobacco 2 (5%) | 1.67            | 40-100                   | 2                 |
|   | 3        | Tobacco 2 (5%) | 1.67            | 101-150                  | 2                 |
|   | 3        | Tobacco 2 (5%) | 1.67            | 151-200                  | 2                 |
| 3 | 2        | Tobacco 1 (3%) | 1.67            | 1-50                     | 2                 |
|   | 2        | Tobacco 1 (3%) | 1.67            | 51-100                   | 2                 |
|   | 2        | Tobacco 1 (3%) | 1.67            | 101-150                  | 2                 |
|   | 2        | Tobacco 1 (3%) | 1.67            | 151-200                  | 2                 |
| 4 | 1        | Tobacco 1 (3%) | 5.00            | 1-60                     | 2                 |
|   | 1        | Tobacco 1 (5%) | 5.00            | 1-120                    | 4                 |
| 5 | 3        | Tobacco 1 (5%) | 7.67            | 1-50                     | 2                 |
|   | 3        | Tobacco 1 (5%) | 7.67            | 51-100                   | 2                 |
|   | 3        | Tobacco 1 (5%) | 7.67            | 101-150                  | 2                 |
| 6 | 3        | Tobacco 1 (5%) | 7.67            | 1-8                      | 2                 |
| 7 | 3        | Tobacco 1 (5%) | 21              | 1-50                     | 2                 |
|   | 3        | Tobacco 1 (5%) | 1               | 51-100                   | 2                 |
|   | 3        | Tobacco 1 (5%) | 21              | 101-150                  | 2                 |

|    |   |                |    |         |     |
|----|---|----------------|----|---------|-----|
| 8  | 1 | Tobacco 1 (5%) | 1  | 1-62    | 0.5 |
| 9  | 1 | Tobacco 1 (5%) | 21 | 1-50    | 2   |
|    | 1 | Tobacco 1 (5%) | 1  | 51-100  | 2   |
|    | 1 | Tobacco 1 (5%) | 21 | 101-150 | 2   |
| 10 | 1 | Tobacco 1 (3%) | 21 | 1-50    | 2   |
|    | 1 | Tobacco 1 (3%) | 1  | 51-100  | 2   |
|    | 1 | Tobacco 1 (3%) | 21 | 101-150 | 2   |

Table S2. Puff conditions for mod-type devices under dynamic chamber setup.

| # | e-liquid         | coil resistance<br>( $\Omega$ ) | power<br>(W) | dilution<br>factor | puff<br>number | puff rate<br>(#/min) |
|---|------------------|---------------------------------|--------------|--------------------|----------------|----------------------|
| 1 | Tobacco 3 (0.3%) | 0.6                             | 22           | 1.91               | 1-50           | 2                    |
|   | Tobacco 3 (0.3%) | 0.6                             | 22           | 1                  | 51-100         | 2                    |
|   | Tobacco 3 (0.3%) | 0.6                             | 22           | 1                  | 101-150        | 2                    |
|   | Tobacco 3 (0.3%) | 0.6                             | 22           | 1                  | 151-200        | 2                    |
| 2 | Tobacco 4 (0.3%) | 0.15                            | 51           | 1.91               | 1-50           | 2                    |
|   | Tobacco 4 (0.3%) | 0.15                            | 51           | 1                  | 51-100         | 2                    |
|   | Tobacco 4 (0.3%) | 0.15                            | 51           | 1                  | 101-150        | 2                    |
|   | Tobacco 4 (0.3%) | 0.15                            | 51           | 1                  | 151-200        | 2                    |
| 3 | Tobacco 3 (0.3%) | 0.15                            | 51           | 1.91               | 201-250        | 2                    |
| 4 | Tobacco 3 (0.3%) | 0.2                             | 45           | 21                 | 1-25           | 0.3                  |
|   | Tobacco 3 (0.3%) | 0.2                             | 45           | 21                 | 101-125        | 0.3                  |
|   | Tobacco 3 (0.3%) | 0.2                             | 45           | 21                 | 201-225        | 0.3                  |
| 5 | Tobacco 3 (0.3%) | 0.6                             | 22           | 21                 | 1-25           | 0.3                  |
|   | Tobacco 3 (0.3%) | 0.6                             | 22           | 21                 | 101-125        | 0.3                  |
|   | Tobacco 3 (0.3%) | 0.6                             | 22           | 21                 | 201-225        | 0.3                  |

|   |                  |     |    |   |         |     |
|---|------------------|-----|----|---|---------|-----|
| 6 | Tobacco 3 (0.3%) | 0.2 | 63 | 3 | 1-25    | 0.3 |
|   | Tobacco 3 (0.3%) | 0.2 | 63 | 3 | 101-125 | 0.3 |
|   | Tobacco 3 (0.3%) | 0.2 | 63 | 3 | 201-225 | 0.3 |
| 7 | Tobacco 3 (0.3%) | 0.6 | 29 | 3 | 1-25    | 0.3 |
|   | Tobacco 3 (0.3%) | 0.6 | 29 | 3 | 101-125 | 0.3 |
|   | Tobacco 3 (0.3%) | 0.6 | 29 | 3 | 201-225 | 0.3 |

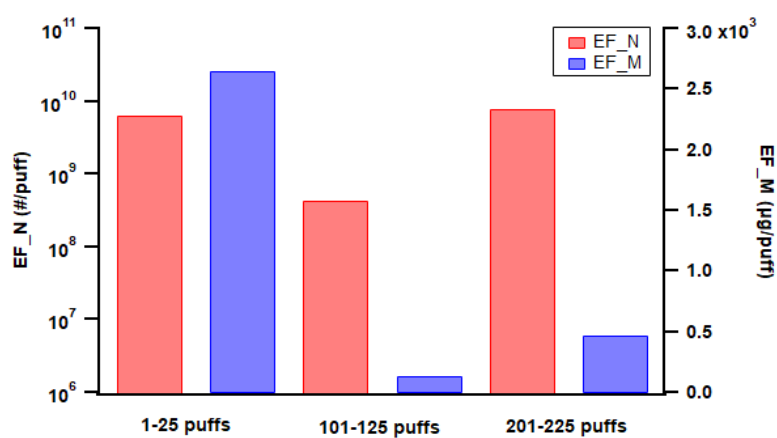

Figure S1. Particle emission factors of number (EF\_N) and mass (EF\_M) for the different puff fractions using the mod-type device (0.2  $\Omega$ , 45 W) with Tobacco 3 flavor e-liquid. Data from one experiment.

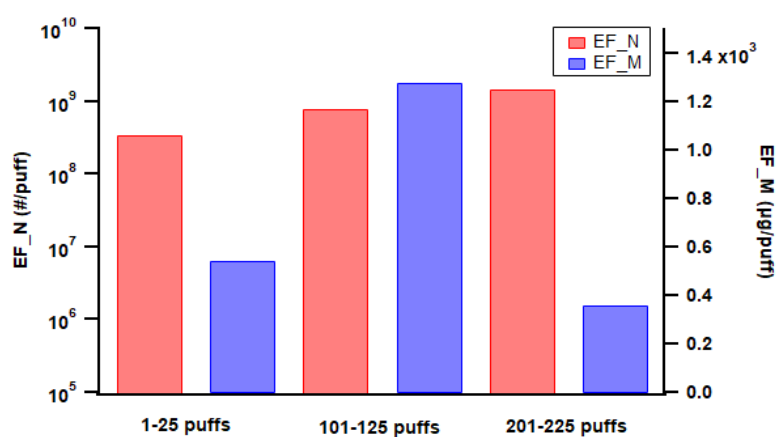

Figure S2. Particle emission factors of number (EF\_N) and mass (EF\_M) for the different puff fractions using the mod-type device (0.2  $\Omega$ , 63 W) with Tobacco 3 flavor e-liquid. Data from one experiment.

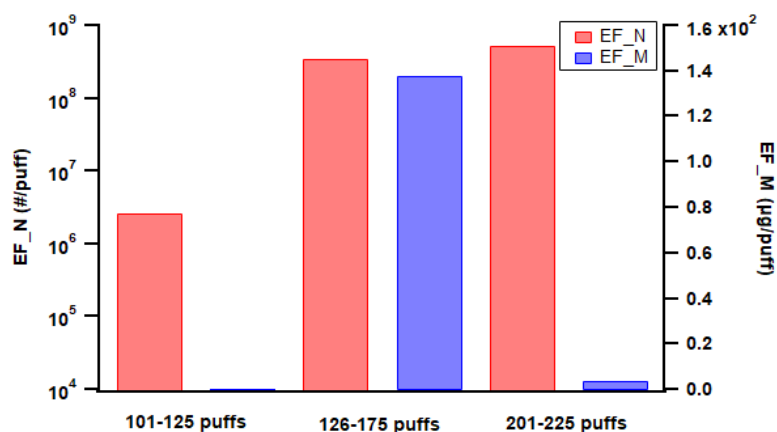

Figure S3. Particle emission factors of number (EF\_N) and mass (EF\_M) for the different puff fractions using the mod-type device (0.6  $\Omega$ , 22 W) with Tobacco 3 flavor e-liquid. Data from one experiment.

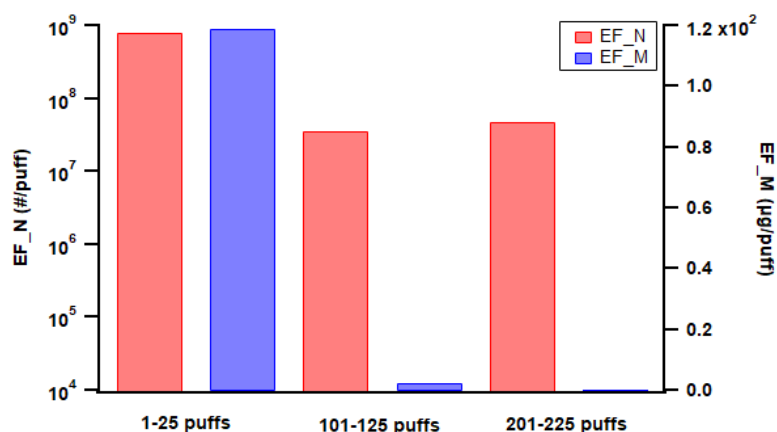

Figure S4. Particle emission factors of number (EF\_N) and mass (EF\_M) for the different puff fractions using the mod-type device (0.6  $\Omega$ , 29 W) with Tobacco 3 flavor e-liquid. Data from one experiment.

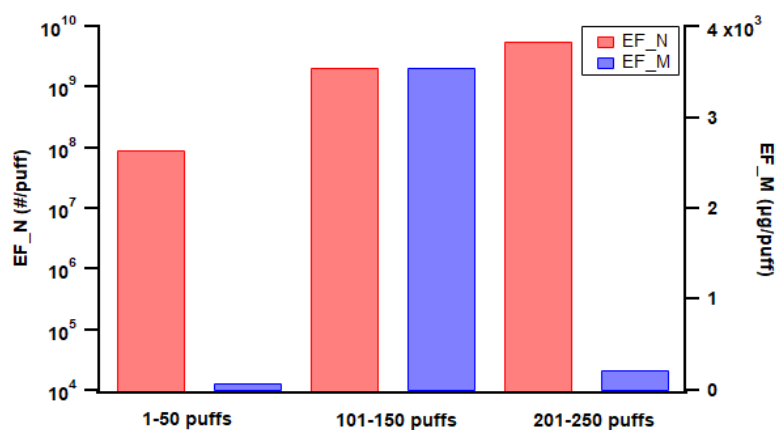

Figure S5. Particle emission factors of number (EF\_N) and mass (EF\_M) for the different puff fractions using the mod-type device (0.15  $\Omega$ , 51 W) with Tobacco 4 flavor e-liquid. Data from one experiment.
